# Supplementary material
Source: PubMed Central journal article supplement (PMC4874435)
Supplement: rsif20160129supp1.pdf [file rsif20160129supp1.pdf]

Table S1 Measured shoot and root dry weights in mycorrhizal and non-mycorrhizal treatments

| DAP-30 d | AM                                      |                                        | NON                                     |                                        |
|----------|-----------------------------------------|----------------------------------------|-----------------------------------------|----------------------------------------|
|          | Shoot<br>(g <sub>dw</sub> ;<br>mean±SD) | Root<br>(g <sub>dw</sub> ;<br>mean±SD) | Shoot<br>(g <sub>dw</sub> ;<br>mean±SD) | Root<br>(g <sub>dw</sub> ;<br>mean±SD) |
| 6        | 0.02±0.01                               | 0.01±0.00                              | 0.01±0.01                               | 0.01±0.00                              |
| 20       | 0.05±0.02                               | 0.02±0.01                              | 0.05±0.03                               | 0.02±0.01                              |
| 34       | 0.12±0.03                               | 0.04±0.01                              | 0.08±0.05                               | 0.03±0.01                              |
| 55       | 0.39±0.07                               | 0.12±0.02                              | 0.19±0.05                               | 0.06±0.02                              |

DAP: days after planting (reduced by 30 days to acknowledge delayed plant development not captured in the simulations), AM: mycorrhizal treatment, NON: non-mycorrhizal control treatment
